# Supplementary material for: Long COVID in a prospective cohort of home-isolated patients
Source: PubMed Central journal article supplement (PMC8440190; doi:10.1038/s41591-021-01433-3), 2021-06-23
Supplement: 41591_2021_1433_MOESM1_ESM.pdf [file 41591_2021_1433_MOESM1_ESM.pdf]

**Supplementary information**

---

**Long COVID in a prospective cohort of home-isolated patients**

---

In the format provided by the authors and unedited

# Long Covid in a prospective cohort of home-isolated individuals

Bjørn Blomberg, Kristin Greve-Isdahl Mohn, Karl Albert Brokstad, Fan Zhou, Dagrun Waag Linchansen, Bent-Are Hansen, Sarah Lartey Jalloh, Therese Bredholt Onyango, Kanika Kuwelker, Marianne Sævik, Hauke Bartsch, Camilla Tøndel, Bård Reiakvam Kittang, Bergen COVID-19 Research Group, Rebecca Jane Cox, Nina Langeland

## Supplementary material

- Page 2    Supplementary Table 1 | Fatigue score at six months follow-up in COVID-19 patients (n=293) and seronegative controls (n=43) older than 15 years
- Page 3    Supplementary Table 2 | Factors associated with fatigue in 293 COVID-19 patients at six months follow-up

Supplementary Table 1 | Fatigue score at six months follow-up in COVID-19 patients (n=293) and seronegative controls (n=43) older than 15 years

| Characteristic              | Seronegative exposed controls | All COVID-19 patients | Hospitalised COVID-19 patients | Home-isolated COVID-19 patients | Hospitalised versus home-isolated |                    |
|-----------------------------|-------------------------------|-----------------------|--------------------------------|---------------------------------|-----------------------------------|--------------------|
|                             | % (n)                         | % (n)                 | % (n)                          | % (n)                           | OR (CI)                           | aOR (CI)           |
|                             | N=43                          | N=293                 | N=62                           | N=231                           |                                   |                    |
| Female                      | 65% (28)                      | 51% (150)             | 45% (28)                       | 53% (122)                       | 0.74 (0.42-1.29)                  | 0.50 (0.24-1.00)*  |
| Age, median (IQR)           | 42 (26-53) <sup>a</sup>       | 47 (33-60)            | 55.5 (45-68)                   | 45 (30-55) <sup>b</sup>         | 1.24 (1.20-1.29)*                 | 1.04 (1.02-1.06)*  |
| Fatigue                     | 14% (6) <sup>a</sup>          | 37% (108)             | 63% (39)                       | 30% (69) <sup>b</sup>           | 3.98 (2.23-7.25)*                 |                    |
| Severe fatigue              | 2% (1)                        | 11% (33)              | 24% (15)                       | 7% (17) <sup>b</sup>            | 4.02 (1.86-8.64)*                 |                    |
| Total score, mean (CI)      | 12.8 (11.9-13.7) <sup>a</sup> | 15.4 (14.8-15.9)      | 18.6 (17.3-20.0)               | 14.5 (13.9-15.0) <sup>b</sup>   | 1.29 (1.20-1.38)*                 |                    |
| Physical fatigue, mean (CI) | 1.1 (1.0-1.2)                 | 1.3 (1.3-1.4)         | 1.7 (1.5-1.8)                  | 1.3 (1.2-1.3) <sup>b</sup>      | 1.36 (1.06-1.67)*                 |                    |
| Tiredness                   | 19% (8) <sup>a</sup>          | 42% (122)             | 66% (41)                       | 35% (81) <sup>b</sup>           | 3.62 (2.02-6.63)*                 | 0.64 (0.16-2.31)   |
| Need for more rest          | 19% (8) <sup>a</sup>          | 39% (114)             | 71% (44)                       | 30% (70) <sup>b</sup>           | 5.62 (3.08-10.63)*                | 5.89 (1.69-22.14)* |
| Feeling sleepy              | 16% (7) <sup>a</sup>          | 32% (94)              | 53% (33)                       | 26% (61) <sup>b</sup>           | 3.17 (1.78-5.69)*                 | 0.86 (0.32-2.30)   |
| Problems starting things    | 12% (5) <sup>a</sup>          | 26% (77)              | 48% (30)                       | 20% (47) <sup>b</sup>           | 3.67 (2.03-6.66)*                 | 0.85 (0.28-2.56)   |
| Lack of energy              | 19% (8) <sup>a</sup>          | 35% (104)             | 58% (36)                       | 29% (68) <sup>b</sup>           | 3.32 (1.87-5.97)*                 | 0.84 (0.24-2.77)   |
| Reduced muscle strength     | 5% (2) <sup>a</sup>           | 24% (70)              | 53% (33)                       | 16% (37) <sup>b</sup>           | 5.97 (3.26-11.07)*                | 2.13 (0.80-5.73)   |
| Feeling weak                | 5% (2) <sup>a</sup>           | 22% (63)              | 45% (28)                       | 15% (35) <sup>b</sup>           | 4.61 (2.49-8.58)*                 | 1.01 (0.34-2.92)   |
| Mental fatigue, mean (CI)   | 1.0 (1.0-1.1)                 | 1.3 (1.2-1.3)         | 1.5(1.4-1.6)                   | 1.2 (1.1-1.2)                   | 1.26 (0.99-1.59)                  |                    |
| Difficulties concentrating  | 5% (2) <sup>a</sup>           | 26% (77)              | 53% (33)                       | 19% (44) <sup>b</sup>           | 4.84 (2.67-8.85)*                 | 3.36 (1.22-9.51)*  |
| Slips of the tongue         | 5% (2)                        | 11% (31)              | 23% (14)                       | 7% (17) <sup>b</sup>            | 3.67 (1.68-7.96)*                 | 1.73 (0.59-5.05)   |
| Difficulty finding words    | 5% (2) <sup>a</sup>           | 28% (81)              | 45% (28)                       | 23% (53) <sup>b</sup>           | 2.77 (1.53-4.98)*                 | 0.45 (0.16-1.17)   |
| Memory problems             | 2% (1) <sup>a</sup>           | 24% (69)              | 44% (27)                       | 18% (42) <sup>b</sup>           | 3.47 (1.90-6.36)*                 | 1.09 (0.38-2.98)   |

OR odds ratio, aOR adjusted odds ratio from binomial logistic regression, CI 95% confidence interval, IQR interquartile range

\* statistically significant difference at level p<0.05.

<sup>a</sup> Significantly lower (p<0.05) in negative controls than in COVID-19 patients.

<sup>b</sup> Significantly lower (p<0.05) in home-isolated than in hospitalised COVID-19 patients.

**Supplementary Table 2 | Factors associated with fatigue in 293 COVID-19 patients at six months follow-up**

| Characteristic                            | All<br>n | Fatigue<br>% (n) | No fatigue<br>% (n) | OR (CI)             | aOR(CI)           |
|-------------------------------------------|----------|------------------|---------------------|---------------------|-------------------|
|                                           | 293      | n=108            | n=185               |                     |                   |
| <b>Baseline features</b>                  |          |                  |                     |                     |                   |
| Female sex                                | 150      | 43% (64)         | 57% (86)            | 1.67 (1.04-2.72)*   | 2.02 (1.13-3.70)* |
| - Male                                    | 143      | 31% (44)         | 69% (99)            | 1                   |                   |
| Age, median (IQR)                         | 293      | 51.5 (37-61)     | 45 (30-57)          | 1.02 (1.00-1.03)*   | 1.01 (0.99-1.03)  |
| <b>Age categories</b>                     |          |                  |                     |                     |                   |
| - 16-30 years                             | 65       | 26% (17)         | 74% (48)            | 1                   |                   |
| - 31-45 years                             | 68       | 35% (24)         | 65% (44)            | 1.54 (0.74-3.28)    |                   |
| - 46-60 years                             | 88       | 40% (35)         | 60% (53)            | 1.86 (0.94-3.81)    |                   |
| - Over 60 years                           | 72       | 44% (32)         | 56% (40)            | 2.26 (1.11-4.73)*   |                   |
| BMI, median (IQR)                         | 293      | 25.3 (23.1-27.7) | 24.7 (23.0-27.2)    | 1.03 (0.97-1.09)    | 0.99 (0.91-1.07)  |
| <b>Any comorbidity</b>                    |          |                  |                     |                     |                   |
| - None                                    | 160      | 29% (46)         | 71% (114)           | 1                   |                   |
| Asthma, COPD <sup>a</sup>                 | 37       | 62% (23)         | 38% (14)            | 3.31 (1.62-6.75)*   | 2.17 (0.97-4.96)  |
| - No lung disease                         | 256      | 33% (85)         | 67% (171)           | 1                   |                   |
| CHD                                       | 21       | 62% (13)         | 38% (8)             | 3.03 (1.21-7.56)*   | 2.23 (0.72-7.25)  |
| - No CHD                                  | 272      | 35% (95)         | 65% (177)           | 1                   |                   |
| Hypertension                              | 34       | 50% (17)         | 50% (17)            | 1.85 (0.90-3.79)    |                   |
| - No hypertension                         | 259      | 35% (91)         | 65% (168)           | 1                   |                   |
| Diabetes                                  | 13       | 46% (6)          | 54% (7)             | 1.49 (0.40-5.39)    |                   |
| - No diabetes                             | 280      | 36% (102)        | 64% (178)           | 1                   |                   |
| CKD                                       | 1        | 100% (1)         | 0% (0)              | NA                  |                   |
| - No CKD                                  | 292      | 37% (107)        | 63% (185)           | 1                   |                   |
| Immunosuppression                         | 10       | 60% (6)          | 40% (4)             | 2.64 (0.61-13.09)   |                   |
| - None                                    | 283      | 36% (102)        | 64% (181)           | 1                   |                   |
| Smoker <sup>b</sup>                       | 95       | 41% (39)         | 59% (56)            | 1.31 (0.79-2.17)    |                   |
| - Never smoked                            | 196      | 35% (68)         | 65% (128)           | 1                   |                   |
| - NA                                      | 2        | 50% (1)          | 50% (1)             |                     |                   |
| <b>Initial illness</b>                    |          |                  |                     |                     |                   |
| Hospitalised                              | 62       | 63% (39)         | 37% (23)            | 3.98 (2.21 – 7.16)* |                   |
| - Home-isolated                           | 231      | 30% (69)         | 70% (162)           | 1                   |                   |
| Days in hospital, mean (CI)               | 293      | 2.9 (1.6-4.3)    | 1.6 (0.5-2.7)       | 1.02 (0.99-1.06)    | 0.97 (0.92-1.02)  |
| <b>Symptoms</b>                           |          |                  |                     |                     |                   |
| <b>Fever</b>                              |          |                  |                     |                     |                   |
| - None                                    | 56       | 54% (30)         | 46% (26)            | 2.39 (1.31-4.36)*   | 2.68 (1.24-5.90)* |
| - No fever                                | 209      | 33% (68)         | 67% (141)           | 1                   |                   |
| <b>Dyspnoea</b>                           |          |                  |                     |                     |                   |
| - None                                    | 147      | 43% (63)         | 57% (84)            | 1.76 (1.05-2.94)*   | 0.86 (0.44-1.66)  |
| - Cough                                   | 117      | 30% (35)         | 70% (82)            | 1                   |                   |
| - None                                    | 191      | 38% (72)         | 62% (119)           | 1.12 (0.64-1.96)    |                   |
| - Fatigue                                 | 74       | 35% (26)         | 65% (48)            | 1.12 (0.48-2.62)    |                   |
| - None                                    | 239      | 37% (89)         | 63% (150)           | 1                   |                   |
| - Myalgia                                 | 26       | 35% (9)          | 65% (17)            | 1.41 (0.84-2.36)    |                   |
| - None                                    | 155      | 40% (62)         | 60% (93)            | 1                   |                   |
| - Headache                                | 109      | 32% (35)         | 68% (74)            | 1.29 (0.76-2.18)    |                   |
| - None                                    | 167      | 40% (66)         | 60% (101)           | 1                   |                   |
| - Severity of illness                     | 95       | 34% (32)         | 66% (63)            |                     |                   |
| - Asymptomatic                            | 3        | 67% (2)          | 33% (1)             | 4.81 (0.45-104.45)  |                   |
| - Symptomatic home-isolated               | 228      | 29% (67)         | 71% (161)           | 1                   |                   |
| - Hospitalised                            | 28       | 61% (17)         | 39% (11)            | 3.71 (1.67-8.58)*   |                   |
| - Need for oxygen                         | 24       | 71% (17)         | 29% (7)             | 5.84 (2.40-15.69)*  |                   |
| - Need for NIV                            | 4        | 75% (3)          | 25% (1)             | 7.21 (0.90-147.17)  |                   |
| - Need for respirator                     | 6        | 33% (2)          | 67% (4)             | 1.20 (0.16-6.31)    |                   |
| Severity, median (IQR) <sup>c</sup>       | 293      | 2 (2-4)          | 2 (2-2)             | 1.49 (1.23-1.83)*   | 1.99 (1.37-2.96)* |
| Spike antibodies <sup>d</sup>             | 293      | 4.1 (3.9-4.2)    | 3.7 (3.6-3.9)       | 1.71 (1.25-2.39)*   | 1.23 (0.81-1.92)  |
| Microneutralising antibodies <sup>d</sup> | 293      | 2.2 (2.1-2.4)    | 1.9 (1.8-2.0)       | 1.78 (1.27-2.52)*   |                   |
| <b>Acute complications</b>                |          |                  |                     |                     |                   |
| ARF                                       | 8        | 38% (3)          | 62% (5)             | 1.03 (0.24-4.39)    |                   |
| - None                                    | 285      | 37% (105)        | 63% (180)           | 1                   |                   |
| Hypotension                               | 3        | 100% (3)         | 0% (0)              | NA                  |                   |
| - None                                    | 290      | 36% (105)        | 64% (185)           | 1                   |                   |
| Lung failure                              | 23       | 52% (12)         | 48% (11)            | 1.98 (0.84-4.65)    |                   |
| - None                                    | 270      | 36% (96)         | 64% (174)           | 1                   |                   |
| Antibiotic use                            | 31       | 55% (17)         | 45% (14)            | 2.28 (1.08-4.84)*   | 0.42 (0.10-1.75)  |
| - None                                    | 62       | 35% (91)         | 65% (171)           | 1                   |                   |

OR: odds ratio, aOR: adjusted odds ratio from multivariable analysis by binomial logistic regression, CI: 95% confidence interval, BMI: body mass index, COPD: chronic obstructive lung disease, CHD: chronic heart disease, CKD: chronic kidney disease, NIV: non-invasive respiratory support, ARF: acute renal failure. Variables were assessed by Poisson regression.

\*Statistical significance at the level  $p < 0.05$

<sup>a</sup> Twenty of 23 had asthma

<sup>b</sup> Current or prior smoker.

<sup>c</sup> Severity on an eight-category ordinal scale.

<sup>d</sup> Means and 95% confidence interval of log<sub>10</sub>-transformed convalescent antibody titres 2 months after initial illness.
